# Supplementary material for: Perioperative Cardiac Output Monitoring Utilizing Non-pulse Contour Methods
Source: Springer Nature journal article supplement (doi:10.1007/s40140-017-0240-7), 2017-10-24
Supplement: MOESM1 [file 16723088]

**Appendix 1.** A brief description of CO monitoring devices and classification according to their underlying principles

*Fick’s principle and its application*

This method is most accurate means of estimating the CO. This method was described by A. Fick in 1870, who stated that the total uptake of a substance by the peripheral tissues is equal to the product of the blood flow to the peripheral tissues and the arterial-venous concentration difference (gradient) of the substance. In adapting the principle into the practice of measuring CO, the tissue is considered as the lung and the substance is oxygen. Following the development of a technique to sample mixed venous blood from the pulmonary artery in early 20th century, this principle could be applied for the measurement of CO in humans. The formula is as follows:

VO2 = (CO CaO2) – (CO CvO2),

where VO2 stands for oxygen consumption, and CaO2 and CvO2 for the arterial and mixed venous oxygen contents. This formula is converted to obtain CO value as:

CO = VO2/ (CaO2 – CvO2)

The partial gas re-breathing method indirectly applies the Fick’s principle to calculate CO by using expired CO2 concentration as an indicator. It is used in intubated patients under mechanical ventilation. In the steady state, the amount of CO2 entering the lungs via the pulmonary artery is proportional to the CO and equals the amount exiting the lungs via expiration and pulmonary veins. CO can be calculated from the differential Fick equation as the difference between VO2 and PETCO2 (partial pressure of end-tidal CO2) in the normal and the rebreathing states. This is expressed in the following equation:

CO = =

where VCO2 is the difference between inspired and expired CO2 content, and CaCO2 is the difference in arterial CO2 content between the normal and rebreathing state, and is estimated by the change in EtCO2 (end-tidal CO2) and multiplied to the slope of the CO2 dissociation curve (S). S is the function of hemoglobin concentration and PaCO2, given as:

S = ,

where Hb stands for hemoglobin concentration and PaCO2 is the arterial CO2 partial pressure. By measuring CO indirectly via CO2 in exhaled gas, the calculated blood flow represents the fraction of the CO that has passed through the ventilated parts of the lungs and is expressed as pulmonary capillary blood flow. Therefore, in order to obtain the total CO, we need to add the part of CO that does not take part in gas exchange, namely the shunt fraction. The shunt fraction is estimated from the FiO2, SpO2, PaO2, and iso-shunt diagrams assuming an arterial–mixed venous oxygen content difference of 50 mL/L.

The inert gas rebreathing method relies on the Fick’s principle in that the rate of disappearance of the blood-soluble gas from the alveolar space is proportional to the flow of blood perfusing the ventilated alveoli (PBF, pulmonary blood flow).

CO = PBF + pulmonary shunt volume.

In the absence of pulmonary shunt flow, the CO is equal to the PBF. At the time of rebreathing, an amount of the soluble gas (nitrous oxide, N2O) disappears from the alveoli by dissolving in tissue and blood. Therefore, the concentration of insoluble gas (sulfur hexafluoride, SF6) decreases from the initial value in the bag to a final equilibrium value obtained after a few breaths. The total systemic volume can be determined from the known volume of the rebreathing bag and the dilution of the insoluble gas. The rate of disappearance of the soluble gas is proportional to the PBF. PBF can be calculated from the rate of uptake of N2O into the blood (slope of the regression line through the logarithmically transformed end-expiratory [alveolar] N2O concentrations plotted against time).

*Indicator dilution technique*

In 1893, G. Stewart developed an indicator-dilution technique to determine CO by utilizing hypertonic saline as an indicator [135]. Based on Stewart’s work, Hamilton used indocyanine green as the indicator, instead of saline, to measure the variation in their concentrations over time in human circulation. After the rapid injection of the indicator at a known injection rate, the concentration of the indicator is measured after its equilibration with blood. Flow can be calculated from the indicator’s concentration and volume over time. The equation for their work is as follows:

Flow = C0V0/ ,

where C0 = initial concentration of indicator, V0 = initial volume of indicator, and the denominator = the integral of indicator concentration over time. For CO measurement, flow of blood in a minute is CO and C0V0 equals the quantity of dye administered.

The transpulmonary ultrasound dilution is another technique that utilizes the Stewart-Hamilton principle to determine CO. This device detects the difference of ultrasound-velocity between the indicator (isotonic saline) and blood to obtain an indicator dilution curve. The ultrasound-velocity of blood (1,560-1,590 m/s) is a function of total protein and ion concentrations. Injection of isotonic saline (1,533 m/s) causes a decrease in ultrasound-velocity, which makes it useful as an indicator.

*Thermodilution technique*

Fegler modified Stewart’s technique by using temperature as an indicator [136]. CO is calculated using the following equation:

CO = VI (TB – TI) K1 × K2 / ,

where VI being the injectate volume, TB, blood temperature, TI, injectate temperature, and K1, the density factor (defined as the specific heat multiplied by the specific gravity, of the injectate, divided by the product of the specific heat and gravity of blood). K2 is a computation constant taking into account the catheter dead space, the heat exchange in transit and the injection rate. The denominator is the change in blood temperature over time. This thermodilution technique was utilized clinically with pulmonary artery catheter (PAC) following the introduction of the balloon-tip PAC by Swan and Gantz in 1970s, is now used for the continuous measurement of CO. Practically, PAC-intermittent thermodilution technique is regarded as the gold standard method for CO measurement. A detailed description of PAC thermodilution is beyond the scope of this review. Transpulmonary thermodilution also employs the above mentioned thermodilution technique.

*Impedance cardiography*

Impedance cardiography (ICG) is based on the finding that trans-thoracic electrical impedance shows small variations that are synchronous with cardiac contraction. Over the course of one heartbeat, the volume of intrathoracic fluid changes, and these changes manifest as changes in impedance (resistance to pulsatile flow). The ICG devices apply a small electrical current across the chest and continuously measure impedance under the assumption that impedance is exclusively a function of changes in the intrathoracic blood. ICG analyses changes of the transmitted current. The received signal has several components including the baseline impedance (Z0), a signal induced by respiration, and signals derived from cardiac blood flow. The amplitude of this small dynamic variation over time, called ∆Z, is superimposed on Z0. Several points on the waveform derived from the device are used to distinguish the specific cardiac cycles. Each of the components of the signal are used to calculate SV and CO [137, 138].

There are several variations of the ICG device. Whole-body ICG, in contrast to the “traditional” thoracic ICG mentioned above, has eliminated the inconsistencies associated with thoracic ICG. Thoracic ICG waveform contains variable impedance signals from multiple sources such as the aorta, lungs, heart itself (including atria, vena cava), and the movements of the heart, which contribute to inconsistencies or errors. In contrast, whole-body ICG detects the change in the volume of blood in the arterial system throughout the body by obtaining an impedance signal at the periphery. Similarly, the transbrachial electrical bioimpedance velocimetry method also avoids the inconsistencies of the thoracic measurement of impedance [93, 94]. The bioreactance method is an alternate method of obtaining a more accurate CO measurement [139]. Unlike bioimpedance, the bioreactance method does not use the static impedance, Z0, and does not depend on the distance between the electrodes for the calculation of SV and CO. Instead, it is based on an analysis of the relative phase shifts of oscillating current that occur when this current traverses the thoracic cavity. The device generates two sets of high frequency current to detect the relative phase shift and rate of change of phase between these signals, both of which contribute to the calculation of SV (CO). In the electrical velocimetry (EV) method, EV is used to interpret impedance changes with systolic blood acceleration, rather than changes in the blood volume. Red blood cells align in the direction of flow in accordance with the systolic blood ejection, while in diastole they flow randomly. These changes in alignment or acceleration are responsible for conductivity changes, and thus the velocity of the blood flow [140].

*Continuous Doppler/ morphological echocardiography*

CO can be measured by ultrasound devices either by the Doppler equation or by non-Doppler morphological-based methods. Doppler technology allows the determination of the speed and direction of blood flow by utilizing the Doppler effect:

V = ,

where V stands for the velocity of a moving reflector, f represents the frequency difference between the emitted and returned ultrasound signal, c is the speed of sound in tissue, f0 is the frequency of the incident ultrasound beam, cos represents cosine, and is the angle of incidence. When used to measure SV, the velocity of blood flow must be integrated over one entire heartbeat (velocity time integral, VTI) and multiplied by the cross-sectional area. Velocity may be measured at various places such as the descending aorta, pulmonary artery, across the cardiac valve, left-ventricular outflow tract (LVOT), or the carotid artery.

For morphological based CO measurement, several methods are available such as the Cubic, Bullet, Teichholz, Simpson methods.

References

135. Stewart GN. Researches on the Circulation Time in Organs and on the Influences which affect it: Parts I.-III. The Journal of physiology. 1893;15(1-2):1-89.

136. Fegler G. Measurement of cardiac output in anaesthetized animals by a thermodilution method. Quarterly journal of experimental physiology and cognate medical sciences. 1954;39(3):153-64.

137. Summers RL, Shoemaker WC, Peacock WF, Ander DS, Coleman TG. Bench to bedside: electrophysiologic and clinical principles of noninvasive hemodynamic monitoring using impedance cardiography. Academic emergency medicine : official journal of the Society for Academic Emergency Medicine. 2003;10(6):669-80.

138. Charloux A, Lonsdorfer-Wolf E, Richard R, Lampert E, Oswald-Mammosser M, Mettauer B et al. A new impedance cardiograph device for the non-invasive evaluation of cardiac output at rest and during exercise: comparison with the "direct" Fick method. European journal of applied physiology. 2000;82(4):313-20. doi:10.1007/s004210000226.

139. Keren H, Burkhoff D, Squara P. Evaluation of a noninvasive continuous cardiac output monitoring system based on thoracic bioreactance. American journal of physiology Heart and circulatory physiology. 2007;293(1):H583-9. doi:10.1152/ajpheart.00195.2007.

140. Bernstein DP, Lemmens HJ. Stroke volume equation for impedance cardiography. Medical & biological engineering & computing. 2005;43(4):443-50.
